# Supplementary material
Source: PubMed Central journal article supplement (PMC5925816)
Supplement: 10.1074_M117.801076_jbc.M117.801076-1.pdf [file 10.1074_M117.801076_jbc.M117.801076-1.pdf]

## **Myeloperoxidase-catalyzed oxidation of cyanide to cyanate: A potential carbamylation route involved in the formation of atherosclerotic plaques?**

Cédric Delporte<sup>1,2a</sup>, Karim Zouaoui Boudjeltia<sup>3a</sup>, Paul G. Furtmüller<sup>4</sup>, Richard A. Maki<sup>5,6</sup>, Marc Dieu<sup>7</sup>, Caroline Noyon<sup>1</sup>, Monika Soudi<sup>4</sup>, Damien Dufour<sup>1,2</sup>, Catherine Coremans<sup>1,2</sup>, Vincent Nuyens<sup>3</sup>, Florence Reye<sup>1</sup>, Alexandre Rousseau<sup>3</sup>, Martine Raes<sup>7</sup>, Nicole Moguilevsky<sup>8</sup>, Michel Vanhaeverbeek<sup>3</sup>, Jean Ducobu<sup>3</sup>, Jean Nève<sup>1</sup>, Bernard Robaye<sup>9</sup>, Luc Vanhamme<sup>10</sup>, Wanda F. Reynolds<sup>6</sup>, Christian Obinger<sup>4a</sup> and Pierre Van Antwerpen<sup>1,2a\*</sup>

<sup>1</sup>Laboratory of Pharmaceutical Chemistry and <sup>2</sup>Analytical Platform, Faculty of Pharmacy, Université Libre de Bruxelles, Brussels, Belgium;

<sup>3</sup>Laboratory of Experimental Medicine, CHU de Charleroi, A. Vésale Hospital, Université Libre de Bruxelles, Montigny-le-Tilleul, Belgium;

<sup>4</sup>Department of Chemistry, Division of Biochemistry, University of Natural Resources and Life Sciences (BOKU), Vienna, Austria;

<sup>5</sup>Torrey Pines Pharmaceuticals, Del Mar, California, United States of America;

<sup>6</sup>Sanford-Burnham-Prebys Medical Discovery Institute, La Jolla, California, United States of America

<sup>7</sup>Laboratory of Cellular Biology, University of Namur, Namur, Belgium;

<sup>8</sup>Technology Transfer Office, University of Namur, Namur, Belgium;

<sup>9</sup>Institute of Interdisciplinary Research, Institut de Recherche Interdisciplinaire en Biologie Humaine et Moléculaire, Faculty of Sciences, Université Libre de Bruxelles, Gosselies, Belgium;

<sup>10</sup>Laboratory of Molecular Parasitology, Institut de Recherche Interdisciplinaire en Biologie Humaine et Moléculaire, Faculty of Sciences, Université Libre de Bruxelles, Gosselies, Belgium;

<sup>a</sup>Contributed equally.

\*Corresponding author: Phone: +3226505263, fax : +32265052489, Email: [pvantwer@ulb.ac.be](mailto:pvantwer@ulb.ac.be)

### Quantification of cyanate formation from cyanide

Cyanate production was carried out at 37 °C in a final volume of 1.0 mL. The reaction mixture contained the following reagents at the final concentrations indicated between brackets: ammonium acetate buffer, pH 7.4 (10 mM), H<sub>2</sub>O<sub>2</sub> (1 mM), cyanide (1 mM). The reaction was started by addition of MPO (300 nM). Alternatively, cyanate was obtained by mixing isotopomers of cyanide (1 mM) and HOCl (1 mM) in the same buffer. After incubation for 1 h, the solution was analyzed by infusion of the samples at 2mL/hour during 3 min into an Agilent 6520 Electrospray ionization (ESI) source Quadrupole Time of flight (QTOF) mass spectrometer (Palo Alto, CA, USA) in negative mode with a source temperature at 325 °C, a VCap at 4500 V, a drying gas at 5 L/min, a nebulizer gas at 10 psig, a fragmentor at 150 V and a skimmer at 80 V. Spectra were accumulated during 2 min. Cyanate concentration was calculated thanks to a calibration curve from 50 to 1000 μM of KOCN.

The results are as follows:

| KOCN conc. (μM) | Average Abundance (n=3) (counts) | SD (counts) |
|-----------------|----------------------------------|-------------|
| 50              | 15                               | 7           |
| 100             | 46                               | 10          |
| 500             | 402                              | 11          |
| 1000            | 904                              | 36          |

| Conditions                                            | Average Abundance (n=3) (counts) | Calculated concentration in <sup>-</sup> OCN (μM) | SD (μM) |
|-------------------------------------------------------|----------------------------------|---------------------------------------------------|---------|
| CN <sup>-</sup> + MPO + H <sub>2</sub> O <sub>2</sub> | 77                               | 131                                               | 5       |
| CN <sup>-</sup> + HOCl                                | 145                              | 202                                               | 5       |

## Legends of supporting materials

### **Suppl. Figure 1. Decay of lactoperoxidase compound I in the presence of cyanide.**

(A) Spectral changes upon addition of 1 mM cyanide to 2  $\mu$ M compound I in the sequential-mixing stopped-flow mode (see Methods). Compound I was formed by mixing 8  $\mu$ M ferric LPO with 8  $\mu$ M H<sub>2</sub>O<sub>2</sub> and waiting for 100 ms. First spectrum was recorded at 1.3 ms, subsequent spectra at 6 ms, 16 ms, 40 ms, 73 ms 157 ms and 9.9 s. Reaction conditions: 100 mM phosphate buffer, pH 7.0, and 25°C. Inset to Figure 1A shows a plot of  $k_{\text{obs}}$  versus cyanide concentration. (B) Spectral changes of HRP compound I (2 $\mu$ M) upon addition of 10 mM cyanide. Inset to Suppl Figure 1B shows absorbance change at 403 nm.

### **Suppl. Figure 2. MS spectra illustrating the carbamyllysine production.**

The production of carbamyllysine was demonstrated with peaks (positive mode) at respectively 190.1177 and 192.1197  $m/z$  corresponding to <sup>12</sup>C- and <sup>13</sup>C<sup>15</sup>N- carbamyllysine. Peak at 191.077 did not allow isolation of the <sup>13</sup>C-isotope. Performed in negative mode, peaks at 188.1079, 189.1120 and 190.1078  $m/z$  were observed corresponding to the isotopomers of carbamyllysine.

### **Suppl. Figure 3. HOCl mediates cyanate and carbamyltaurine production.**

Addition of hypochlorous acid (HOCl) promotes oxidation of cyanide into cyanate such as indicated by the peaks at 43.0028 and 43.9999  $m/z$  corresponding to <sup>13</sup>C- and <sup>13</sup>C<sup>15</sup>N- cyanate. In the presence of taurine, addition of HOCl has also allowed the production of carbamyltaurine (right panel).

### **Suppl. Figure 4. Reaction of recombinant myeloperoxidase compound I with**

**cyanide.** Typical time traces with single exponential fit showing the transition of 1.6  $\mu$ M compound I to the ferric MPO cyanide complex. Reactions were followed at 456 nm, the maximum absorbance of MPO cyanide complex. Pseudo-first-order rate constants for compound I reduction by cyanide. The second-order rate constants were calculated from the slope ( $k_{\text{app}} = 2.5 \times 10^5 \text{ M}^{-1} \text{ s}^{-1}$ ).

**Suppl. Figure 5. Absorbance spectra of myeloperoxidase compound II and myeloperoxidase-cyanide complex.** Absorbance spectra were acquired between 290 and 740 nm for the myeloperoxidase compound II (MPO-Compound II) and myeloperoxidase cyanide complex (MPO-CN<sup>-</sup>). For both spectrum, a Soret maximum at 456 nm is observed.

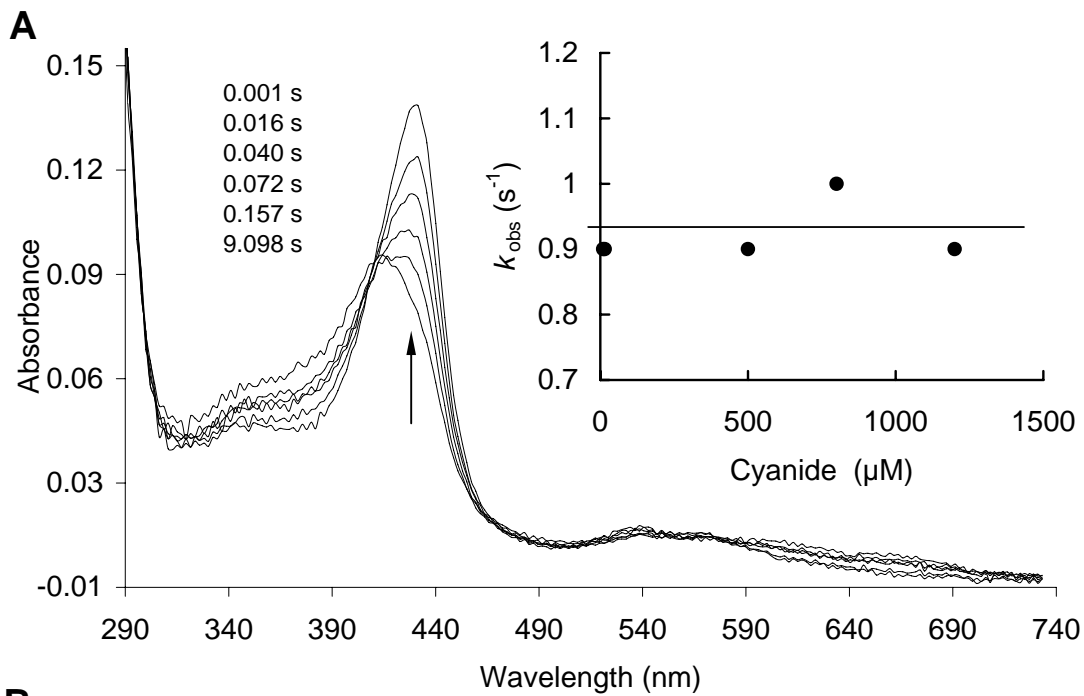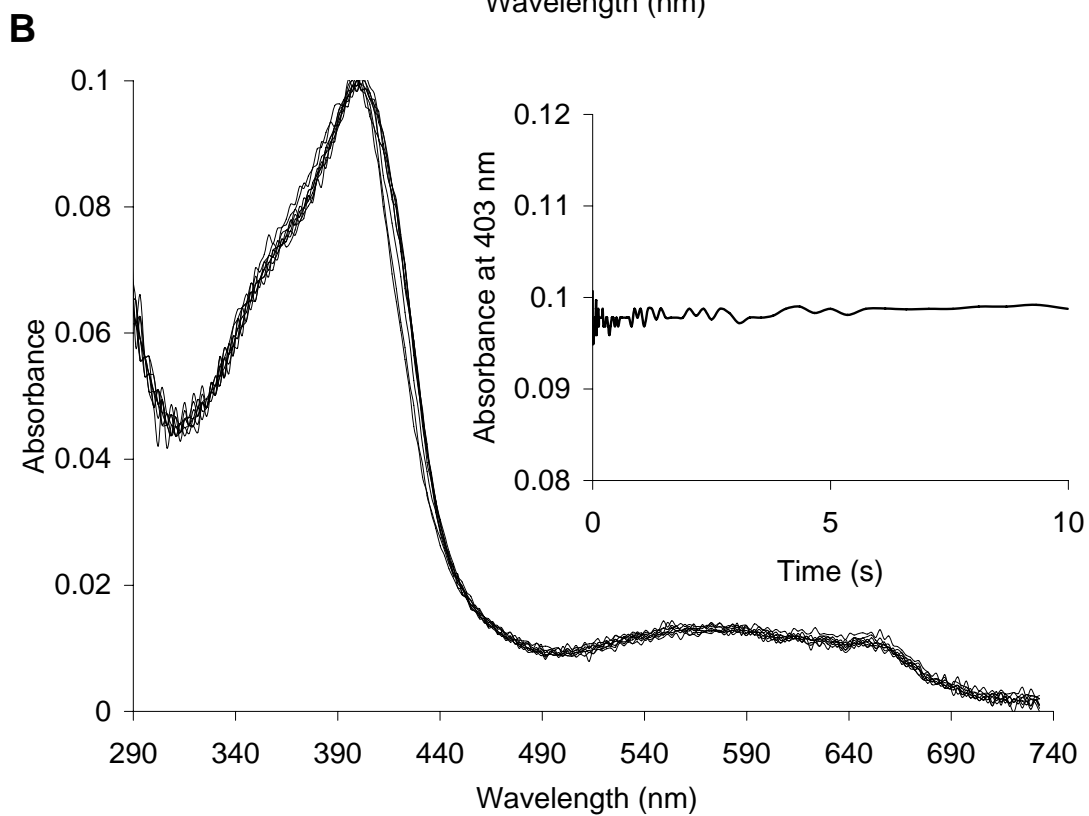

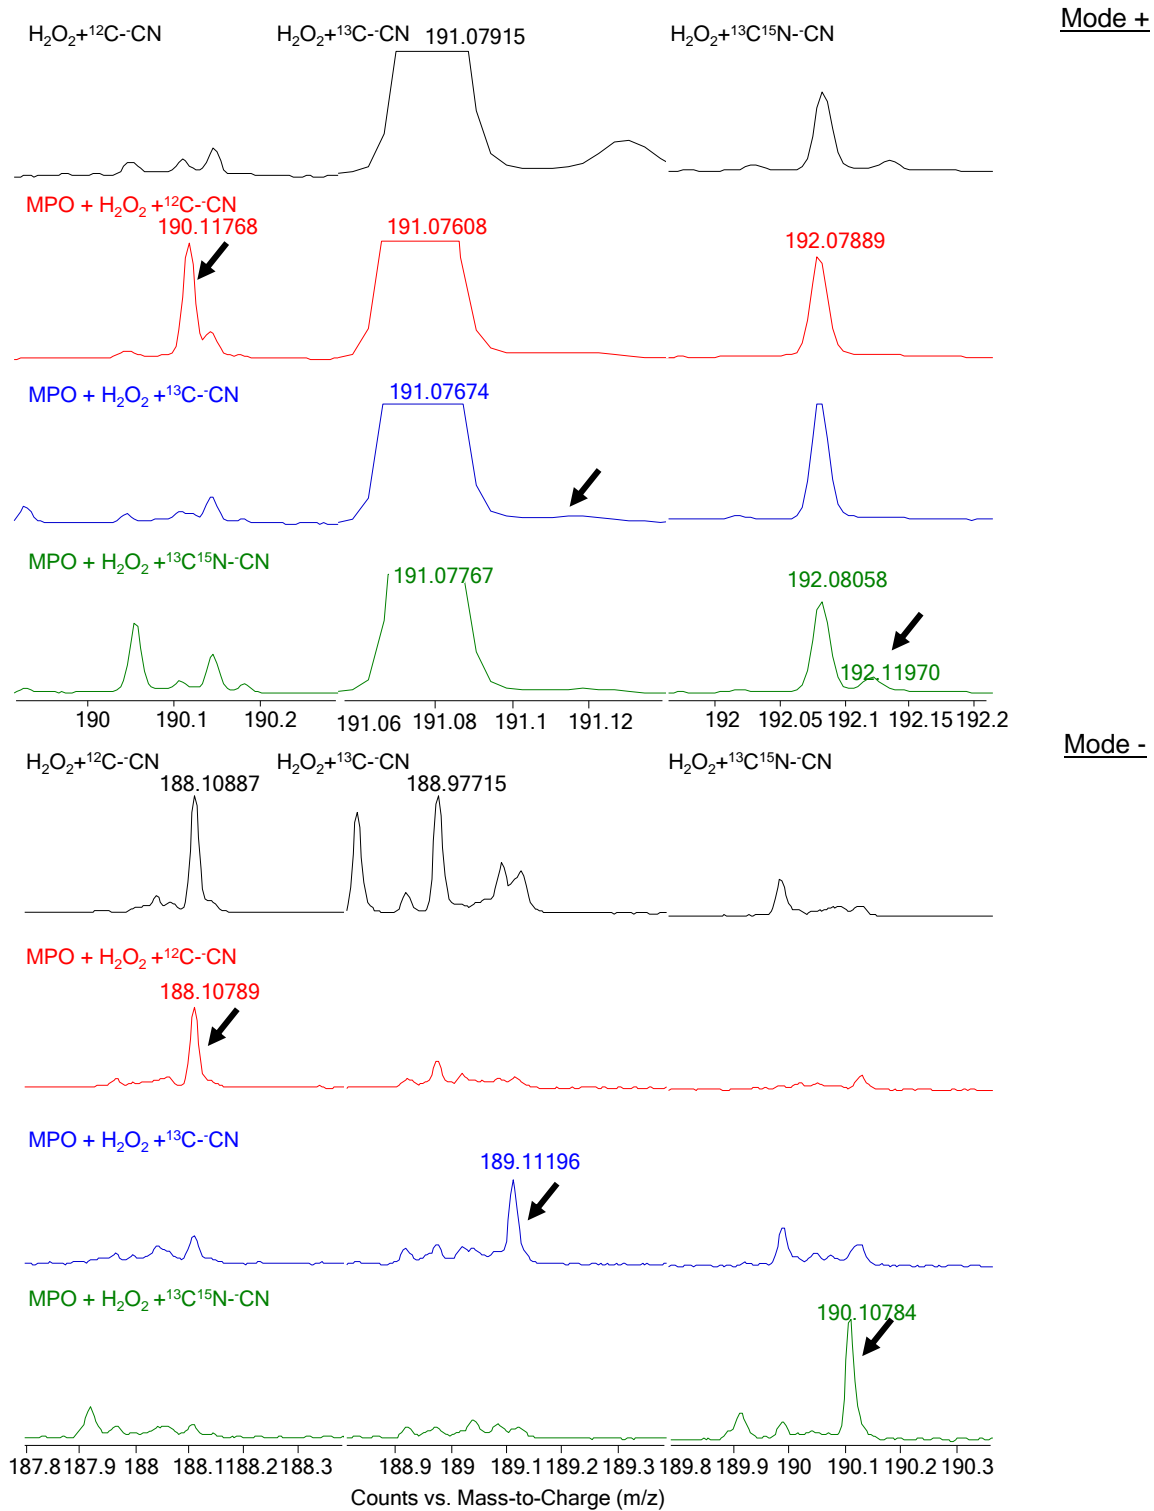

Suppl. Figure 2, Delporte, C., et al.

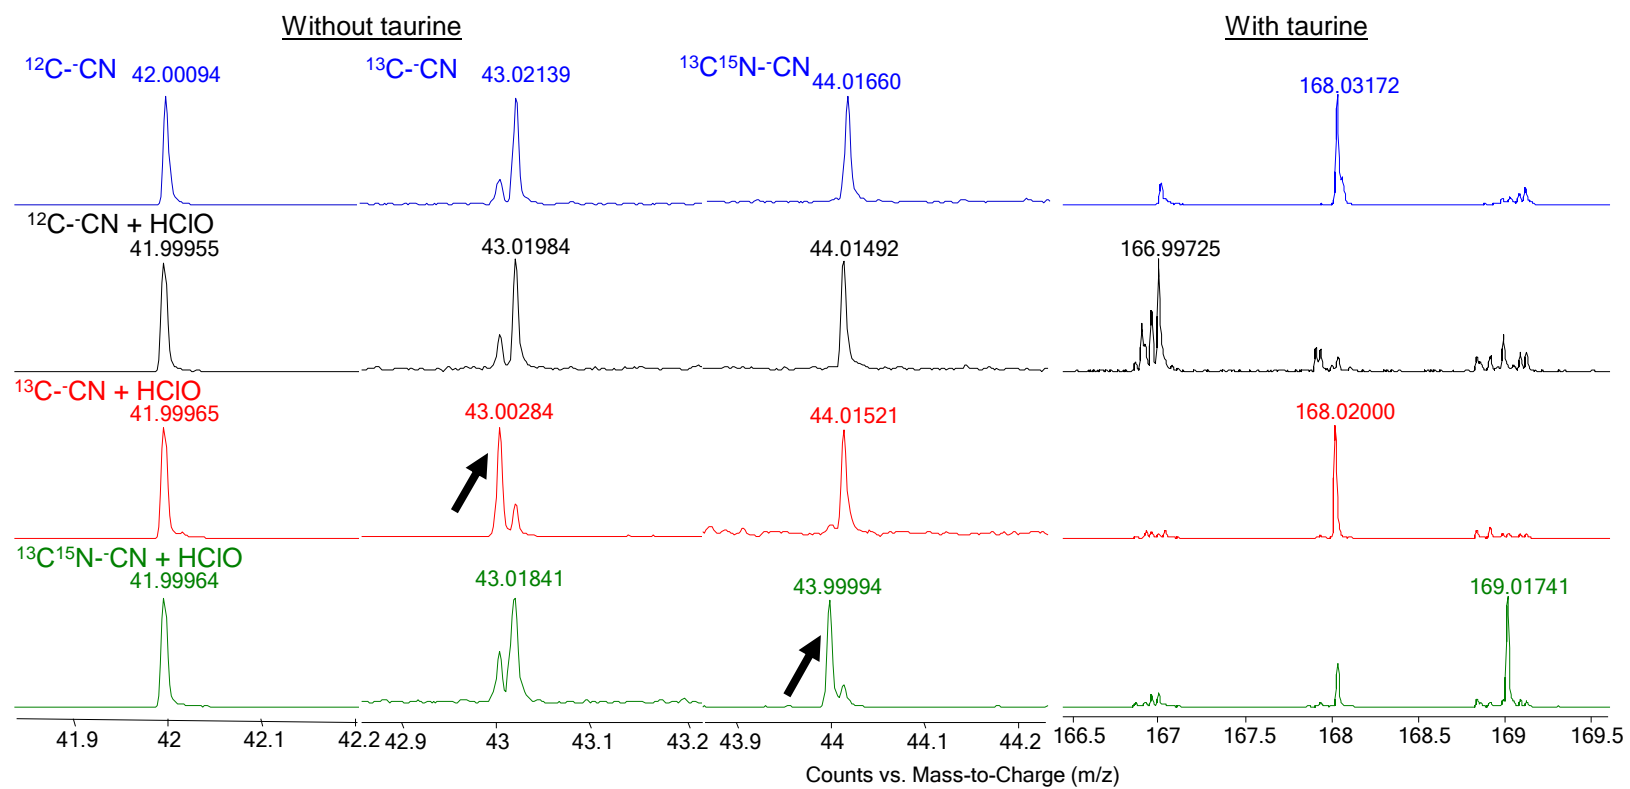

Suppl. Figure 3, Delporte, C., et al.

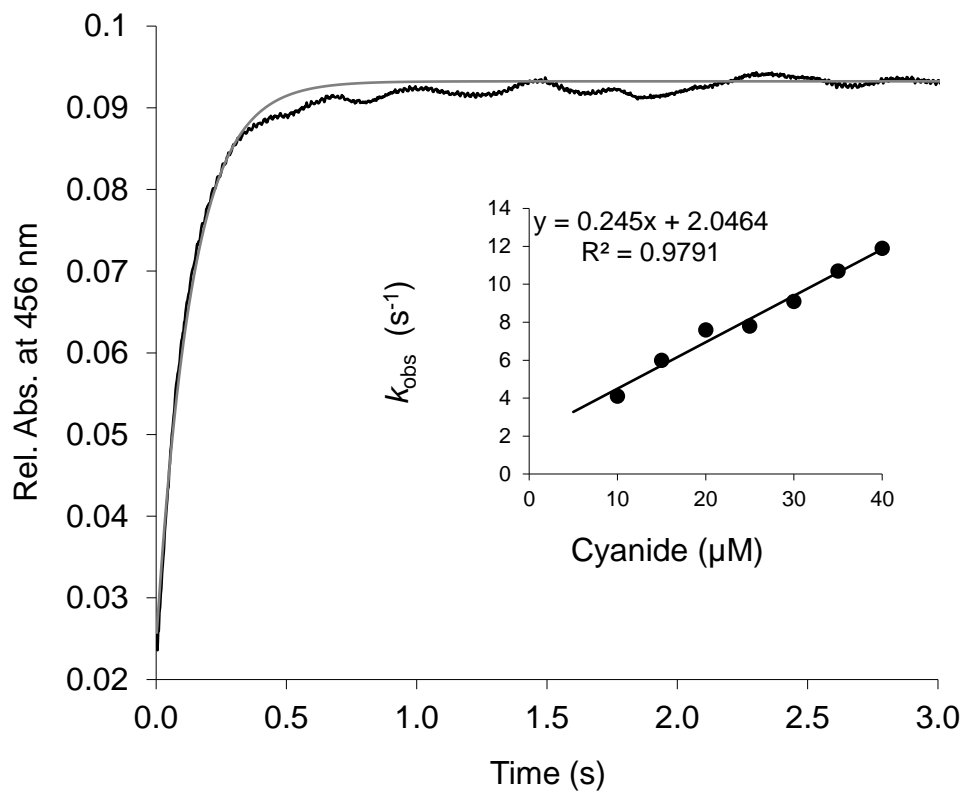

$$k_{app} = 2.5 \times 10^5 \text{ M}^{-1} \text{ s}^{-1}$$

Suppl Figure 4, Delporte, C., et al.



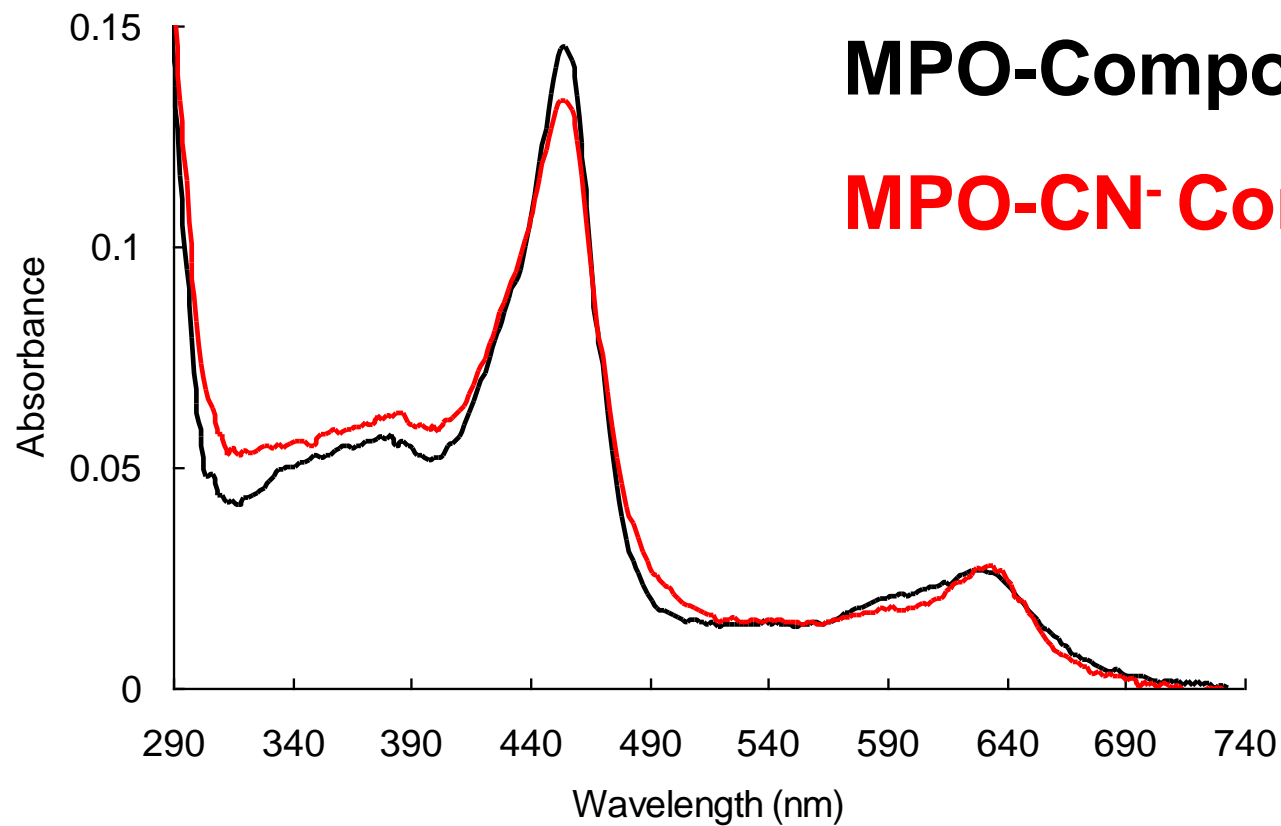

**MPO-Compound II**

**MPO-CN- Complex**
